# Supplementary material
Source: publisher figshare collection journal article supplement (https://acs.figshare.com/ndownloader/files/3953047)
Supplement: Supplementary file 1 [file 3953047]

 
data_shelxl 
 
_audit_creation_method            SHELXL-97 
_chemical_name_systematic 
; 
 ? 
; 
_chemical_name_common             ? 
_chemical_melting_point           ? 
_chemical_formula_moiety          ? 
_chemical_formula_sum 
 'C36 H30 F3 N O' 
_chemical_formula_weight          549.61 
 
loop_ 
 _atom_type_symbol 
 _atom_type_description 
 _atom_type_scat_dispersion_real 
 _atom_type_scat_dispersion_imag 
 _atom_type_scat_source 
 'C'  'C'   0.0033   0.0016 
 'International Tables Vol C Tables 4.2.6.8 and 6.1.1.4' 
 'H'  'H'   0.0000   0.0000 
 'International Tables Vol C Tables 4.2.6.8 and 6.1.1.4' 
 'N'  'N'   0.0061   0.0033 
 'International Tables Vol C Tables 4.2.6.8 and 6.1.1.4' 
 'O'  'O'   0.0106   0.0060 
 'International Tables Vol C Tables 4.2.6.8 and 6.1.1.4' 
 'F'  'F'   0.0171   0.0103 
 'International Tables Vol C Tables 4.2.6.8 and 6.1.1.4' 
 
_symmetry_cell_setting           'Monoclinic'
_symmetry_space_group_name_H-M   'P2(1)/n  '
loop_ 
 _symmetry_equiv_pos_as_xyz 
 'x, y, z' 
 '-x+1/2, y+1/2, -z+1/2' 
 '-x, -y, -z' 
 'x-1/2, -y-1/2, z-1/2' 
 
_cell_length_a                    11.401(3) 
_cell_length_b                    14.913(4) 
_cell_length_c                    15.965(4) 
_cell_angle_alpha                 90.00 
_cell_angle_beta                  97.817(3) 
_cell_angle_gamma                 90.00 
_cell_volume                      2689.2(11) 
_cell_formula_units_Z             4 
_cell_measurement_temperature     123 
_cell_measurement_reflns_used    3066
_cell_measurement_theta_min        2.35
_cell_measurement_theta_max       27.43
_exptl_crystal_description        'block'
_exptl_crystal_colour             'colorless'
_exptl_crystal_size_max           0.20 
_exptl_crystal_size_mid           0.20 
_exptl_crystal_size_min           0.10 
_exptl_crystal_density_meas       ? 
_exptl_crystal_density_diffrn     1.357 
_exptl_crystal_density_method     'not measured' 
_exptl_crystal_F_000              1152 
_exptl_absorpt_coefficient_mu     0.095 
_exptl_absorpt_correction_type    empirical
_exptl_absorpt_correction_T_min   0.9812 
_exptl_absorpt_correction_T_max   0.9906 
_exptl_absorpt_process_details    
;
SADABS Sheldrick 1996
;
_exptl_special_details 
; 
 ? 
; 
 
_diffrn_ambient_temperature       123 
_diffrn_radiation_wavelength      0.71073 
_diffrn_radiation_type            MoK\a 
_diffrn_radiation_source          'Bruker TXS fine-focus rotating anode' 
_diffrn_radiation_monochromator   'Bruker Helios multilayer confocal mirror' 
_diffrn_measurement_device_type   'Bruker APEXII CCD area detector' 
_diffrn_measurement_method        'phi and omega scans' 
_diffrn_detector_area_resol_mean  8.333
_diffrn_reflns_number             15024 
_diffrn_reflns_av_R_equivalents   0.0455 
_diffrn_reflns_av_sigmaI/netI     0.0679 
_diffrn_reflns_limit_h_min        -14 
_diffrn_reflns_limit_h_max        11 
_diffrn_reflns_limit_k_min        -15 
_diffrn_reflns_limit_k_max        19 
_diffrn_reflns_limit_l_min        -19 
_diffrn_reflns_limit_l_max        20 
_diffrn_reflns_theta_min          1.88 
_diffrn_reflns_theta_max          27.72 
_reflns_number_total              6173 
_reflns_number_gt                 3948 
_reflns_threshold_expression      >2sigma(I) 
 
_computing_data_collection        'APEX2 (Bruker AXS, 2006)'
_computing_cell_refinement        'APEX2 (Bruker AXS, 2006)'
_computing_data_reduction         'SAINT (Bruker AXS, 2004)'
_computing_structure_solution     'SHELXS-97 (Sheldrick, 1997)'
_computing_structure_refinement   'SHELXL-97 (Sheldrick, 1997)'
_computing_molecular_graphics     'XSHEL (Bruker AXS,2002)'
_computing_publication_material   'XCIF (Bruker AXS, 2001)' 
_refine_special_details 
; 
 Refinement of F^2^ against ALL reflections.  The weighted R-factor wR and 
 goodness of fit S are based on F^2^, conventional R-factors R are based 
 on F, with F set to zero for negative F^2^. The threshold expression of 
 F^2^ > 2sigma(F^2^) is used only for calculating R-factors(gt) etc. and is 
 not relevant to the choice of reflections for refinement.  R-factors based 
 on F^2^ are statistically about twice as large as those based on F, and R- 
 factors based on ALL data will be even larger. 
; 
 
_refine_ls_structure_factor_coef  Fsqd  
_refine_ls_matrix_type            full 
_refine_ls_weighting_scheme       calc  
_refine_ls_weighting_details 
 'calc w=1/[\s^2^(Fo^2^)+(0.0477P)^2^+0.6447P] where P=(Fo^2^+2Fc^2^)/3' 
_atom_sites_solution_primary      direct 
_atom_sites_solution_secondary    difmap 
_atom_sites_solution_hydrogens    geom 
_refine_ls_hydrogen_treatment     constr
_refine_ls_extinction_method      none 
_refine_ls_extinction_coef        ? 
_refine_ls_number_reflns          6173 
_refine_ls_number_parameters      370 
_refine_ls_number_restraints      0 
_refine_ls_R_factor_all           0.0955 
_refine_ls_R_factor_gt            0.0487 
_refine_ls_wR_factor_ref          0.1156 
_refine_ls_wR_factor_gt           0.1008 
_refine_ls_goodness_of_fit_ref    1.012 
_refine_ls_restrained_S_all       1.012 
_refine_ls_shift/su_max           0.001 
_refine_ls_shift/su_mean          0.000 
 
loop_ 
 _atom_site_label 
 _atom_site_type_symbol 
 _atom_site_fract_x 
 _atom_site_fract_y 
 _atom_site_fract_z 
 _atom_site_U_iso_or_equiv 
 _atom_site_adp_type 
 _atom_site_occupancy 
 _atom_site_symmetry_multiplicity 
 _atom_site_calc_flag 
 _atom_site_refinement_flags 
 _atom_site_disorder_assembly 
 _atom_site_disorder_group 
C3 C 0.24473(16) 0.78209(13) 0.87257(10) 0.0166(4) Uani 1 1 d . . . 
H3 H 0.2368 0.8475 0.8593 0.020 Uiso 1 1 calc R . . 
C2 C 0.16527(16) 0.64001(12) 0.82897(11) 0.0172(4) Uani 1 1 d . . . 
H2 H 0.2483 0.6171 0.8411 0.021 Uiso 1 1 calc R . . 
C13 C 0.42916(16) 0.75765(12) 0.96279(11) 0.0174(4) Uani 1 1 d . . . 
C1 C 0.18997(16) 0.66626(13) 0.97473(11) 0.0185(4) Uani 1 1 d . . . 
H1 H 0.2664 0.6330 0.9766 0.022 Uiso 1 1 calc R . . 
C4 C 0.37445(16) 0.75712(12) 0.87780(11) 0.0164(4) Uani 1 1 d . . . 
C6 C 0.55893(16) 0.71312(13) 0.83223(11) 0.0187(4) Uani 1 1 d . . . 
C9 C 0.79776(17) 0.66267(14) 0.87190(12) 0.0250(4) Uani 1 1 d . . . 
H9 H 0.8784 0.6454 0.8849 0.030 Uiso 1 1 calc R . . 
C5 C 0.43723(16) 0.73598(12) 0.81359(11) 0.0177(4) Uani 1 1 d . . . 
H5 H 0.3997 0.7366 0.7567 0.021 Uiso 1 1 calc R . . 
C12 C 0.54479(16) 0.73402(13) 0.98307(11) 0.0195(4) Uani 1 1 d . . . 
H12 H 0.5801 0.7335 1.0405 0.023 Uiso 1 1 calc R . . 
C14 C 0.34024(16) 0.78636(14) 1.01931(11) 0.0207(4) Uani 1 1 d . . . 
H14A H 0.3491 0.8509 1.0334 0.025 Uiso 1 1 calc R . . 
H14B H 0.3501 0.7513 1.0724 0.025 Uiso 1 1 calc R . . 
C10 C 0.73207(16) 0.68252(13) 0.93589(11) 0.0198(4) Uani 1 1 d . . . 
H10 H 0.7677 0.6776 0.9931 0.024 Uiso 1 1 calc R . . 
C8 C 0.74463(17) 0.66806(15) 0.78703(13) 0.0276(5) Uani 1 1 d . . . 
H8 H 0.7901 0.6553 0.7429 0.033 Uiso 1 1 calc R . . 
C11 C 0.61285(16) 0.71002(13) 0.91797(11) 0.0186(4) Uani 1 1 d . . . 
C7 C 0.62885(17) 0.69136(13) 0.76784(12) 0.0240(5) Uani 1 1 d . . . 
H7 H 0.5940 0.6931 0.7103 0.029 Uiso 1 1 calc R . . 
C15 C 0.21851(16) 0.76752(13) 0.96699(11) 0.0183(4) Uani 1 1 d . . . 
C16 C 0.09966(16) 0.58032(13) 0.76226(11) 0.0179(4) Uani 1 1 d . . . 
C17 C 0.12681(17) 0.58563(14) 0.67976(12) 0.0256(5) Uani 1 1 d . . . 
H17 H 0.1809 0.6298 0.6658 0.031 Uiso 1 1 calc R . . 
C21 C 0.01968(17) 0.51566(13) 0.78086(12) 0.0230(4) Uani 1 1 d . . . 
H21 H 0.0007 0.5110 0.8368 0.028 Uiso 1 1 calc R . . 
C19 C -0.00454(18) 0.46356(14) 0.63756(12) 0.0268(5) Uani 1 1 d . . . 
H19 H -0.0405 0.4237 0.5952 0.032 Uiso 1 1 calc R . . 
C18 C 0.07543(18) 0.52683(15) 0.61783(12) 0.0291(5) Uani 1 1 d . . . 
H18 H 0.0954 0.5302 0.5621 0.035 Uiso 1 1 calc R . . 
C20 C -0.03265(18) 0.45809(14) 0.71947(13) 0.0286(5) Uani 1 1 d . . . 
H20 H -0.0880 0.4146 0.7331 0.034 Uiso 1 1 calc R . . 
C23 C 0.06315(16) 0.85212(13) 0.71672(11) 0.0191(4) Uani 1 1 d . . . 
C22 C 0.05674(16) 0.77250(13) 0.77451(11) 0.0188(4) Uani 1 1 d . . . 
H22A H 0.0190 0.7917 0.8239 0.023 Uiso 1 1 calc R . . 
H22B H 0.0054 0.7262 0.7439 0.023 Uiso 1 1 calc R . . 
C28 C -0.03917(18) 0.90293(14) 0.69422(12) 0.0256(5) Uani 1 1 d . . . 
H28 H -0.1092 0.8881 0.7173 0.031 Uiso 1 1 calc R . . 
C25 C 0.16345(18) 0.94718(14) 0.62689(12) 0.0247(5) Uani 1 1 d . . . 
H25 H 0.2331 0.9623 0.6035 0.030 Uiso 1 1 calc R . . 
C26 C 0.06168(19) 0.99650(14) 0.60570(12) 0.0286(5) Uani 1 1 d . . . 
H26 H 0.0613 1.0459 0.5681 0.034 Uiso 1 1 calc R . . 
C27 C -0.04051(19) 0.97387(14) 0.63948(13) 0.0293(5) Uani 1 1 d . . . 
H27 H -0.1111 1.0075 0.6247 0.035 Uiso 1 1 calc R . . 
C24 C 0.16477(17) 0.87512(13) 0.68258(11) 0.0215(4) Uani 1 1 d . . . 
H24 H 0.2354 0.8416 0.6972 0.026 Uiso 1 1 calc R . . 
C29 C 0.11913(17) 0.82822(13) 0.99329(12) 0.0209(4) Uani 1 1 d . . . 
H29A H 0.0432 0.8102 0.9599 0.025 Uiso 1 1 calc R . . 
H29B H 0.1126 0.8165 1.0535 0.025 Uiso 1 1 calc R . . 
C30 C 0.13500(16) 0.92798(13) 0.98221(12) 0.0216(4) Uani 1 1 d . . . 
C31 C 0.18971(17) 0.98103(15) 1.04819(13) 0.0279(5) Uani 1 1 d . . . 
H31 H 0.2201 0.9539 1.1005 0.034 Uiso 1 1 calc R . . 
C35 C 0.09116(17) 0.97010(14) 0.90730(13) 0.0253(5) Uani 1 1 d . . . 
H35 H 0.0518 0.9355 0.8620 0.030 Uiso 1 1 calc R . . 
C33 C 0.15855(18) 1.11273(15) 0.96258(15) 0.0349(6) Uani 1 1 d . . . 
H33 H 0.1676 1.1755 0.9554 0.042 Uiso 1 1 calc R . . 
C32 C 0.20031(18) 1.07323(15) 1.03822(14) 0.0320(5) Uani 1 1 d . . . 
H32 H 0.2365 1.1088 1.0839 0.038 Uiso 1 1 calc R . . 
C34 C 0.10340(18) 1.06150(15) 0.89688(14) 0.0311(5) Uani 1 1 d . . . 
H34 H 0.0739 1.0889 0.8445 0.037 Uiso 1 1 calc R . . 
C36 C 0.13370(17) 0.63651(14) 1.05137(11) 0.0230(4) Uani 1 1 d . . . 
F2 F 0.01972(9) 0.65986(8) 1.04821(7) 0.0294(3) Uani 1 1 d . . . 
F1 F 0.13760(11) 0.54699(8) 1.05824(7) 0.0329(3) Uani 1 1 d . . . 
F3 F 0.19053(10) 0.66918(8) 1.12412(6) 0.0309(3) Uani 1 1 d . . . 
N1 N 0.17153(13) 0.73233(10) 0.80489(9) 0.0167(3) Uani 1 1 d . . . 
O1 O 0.11199(11) 0.63129(9) 0.90592(7) 0.0191(3) Uani 1 1 d . . . 
 
loop_ 
 _atom_site_aniso_label 
 _atom_site_aniso_U_11 
 _atom_site_aniso_U_22 
 _atom_site_aniso_U_33 
 _atom_site_aniso_U_23 
 _atom_site_aniso_U_13 
 _atom_site_aniso_U_12 
C3 0.0207(10) 0.0154(10) 0.0143(8) 0.0006(7) 0.0042(7) 0.0005(8) 
C2 0.0184(10) 0.0177(10) 0.0168(9) 0.0016(7) 0.0070(7) 0.0008(8) 
C13 0.0190(10) 0.0149(10) 0.0191(9) -0.0015(7) 0.0051(8) -0.0011(8) 
C1 0.0194(10) 0.0223(11) 0.0145(9) 0.0000(7) 0.0044(7) 0.0035(8) 
C4 0.0183(10) 0.0119(9) 0.0192(9) 0.0025(7) 0.0038(8) -0.0013(7) 
C6 0.0197(10) 0.0162(10) 0.0211(9) 0.0001(7) 0.0059(8) -0.0018(8) 
C9 0.0150(10) 0.0252(12) 0.0349(11) -0.0015(9) 0.0034(8) 0.0011(8) 
C5 0.0199(10) 0.0162(10) 0.0170(9) 0.0023(7) 0.0031(7) -0.0018(8) 
C12 0.0232(10) 0.0178(10) 0.0172(9) 0.0004(7) 0.0018(8) -0.0012(8) 
C14 0.0205(10) 0.0239(11) 0.0177(9) -0.0039(8) 0.0028(8) 0.0022(8) 
C10 0.0184(10) 0.0192(11) 0.0211(10) -0.0026(8) 0.0002(8) -0.0006(8) 
C8 0.0175(10) 0.0357(13) 0.0322(11) -0.0071(9) 0.0123(9) -0.0016(9) 
C11 0.0182(10) 0.0156(10) 0.0220(9) 0.0000(7) 0.0027(8) -0.0017(8) 
C7 0.0251(11) 0.0275(12) 0.0206(10) -0.0005(8) 0.0072(8) -0.0039(9) 
C15 0.0209(10) 0.0189(10) 0.0157(9) -0.0008(7) 0.0049(8) 0.0008(8) 
C16 0.0182(10) 0.0171(10) 0.0186(9) -0.0013(7) 0.0033(8) 0.0018(8) 
C17 0.0273(11) 0.0284(12) 0.0223(10) -0.0010(8) 0.0077(8) -0.0049(9) 
C21 0.0272(11) 0.0214(11) 0.0222(10) -0.0009(8) 0.0102(8) -0.0023(8) 
C19 0.0273(11) 0.0244(12) 0.0274(11) -0.0081(9) -0.0006(9) 0.0014(9) 
C18 0.0322(12) 0.0365(13) 0.0195(10) -0.0043(9) 0.0067(9) -0.0036(10) 
C20 0.0282(12) 0.0229(12) 0.0357(12) -0.0030(9) 0.0078(9) -0.0083(9) 
C23 0.0223(10) 0.0177(11) 0.0165(9) -0.0020(7) -0.0005(8) -0.0005(8) 
C22 0.0163(10) 0.0193(10) 0.0210(9) 0.0019(8) 0.0037(8) 0.0004(8) 
C28 0.0234(11) 0.0245(12) 0.0277(10) 0.0012(9) -0.0004(9) -0.0008(9) 
C25 0.0312(12) 0.0212(11) 0.0218(10) -0.0013(8) 0.0038(9) -0.0063(9) 
C26 0.0410(13) 0.0187(11) 0.0229(10) 0.0048(8) -0.0067(9) -0.0048(9) 
C27 0.0287(12) 0.0215(12) 0.0340(11) 0.0014(9) -0.0086(9) 0.0033(9) 
C24 0.0248(11) 0.0196(11) 0.0195(9) 0.0002(8) 0.0007(8) 0.0008(8) 
C29 0.0212(10) 0.0217(11) 0.0212(9) -0.0014(8) 0.0083(8) 0.0031(8) 
C30 0.0195(10) 0.0201(11) 0.0267(10) -0.0040(8) 0.0082(8) 0.0052(8) 
C31 0.0246(11) 0.0285(12) 0.0316(11) -0.0066(9) 0.0070(9) 0.0030(9) 
C35 0.0238(11) 0.0221(11) 0.0313(11) -0.0027(9) 0.0091(9) 0.0043(9) 
C33 0.0261(12) 0.0213(12) 0.0609(16) -0.0053(11) 0.0188(11) -0.0012(9) 
C32 0.0216(11) 0.0267(13) 0.0483(14) -0.0139(10) 0.0073(10) -0.0005(9) 
C34 0.0285(12) 0.0260(12) 0.0413(13) 0.0045(10) 0.0133(10) 0.0072(9) 
C36 0.0267(11) 0.0255(12) 0.0175(9) 0.0029(8) 0.0057(8) 0.0026(9) 
F2 0.0244(7) 0.0379(8) 0.0286(6) 0.0051(5) 0.0129(5) 0.0009(5) 
F1 0.0478(8) 0.0233(7) 0.0308(6) 0.0091(5) 0.0168(6) 0.0024(6) 
F3 0.0372(7) 0.0407(8) 0.0156(5) 0.0008(5) 0.0063(5) 0.0004(6) 
N1 0.0178(8) 0.0175(9) 0.0146(7) 0.0018(6) 0.0009(6) 0.0010(6) 
O1 0.0222(7) 0.0210(7) 0.0153(6) -0.0002(5) 0.0070(5) -0.0020(6) 
 
_geom_special_details 
; 
 All esds (except the esd in the dihedral angle between two l.s. planes) 
 are estimated using the full covariance matrix.  The cell esds are taken 
 into account individually in the estimation of esds in distances, angles 
 and torsion angles; correlations between esds in cell parameters are only 
 used when they are defined by crystal symmetry.  An approximate (isotropic) 
 treatment of cell esds is used for estimating esds involving l.s. planes. 
; 
 
loop_ 
 _geom_bond_atom_site_label_1 
 _geom_bond_atom_site_label_2 
 _geom_bond_distance 
 _geom_bond_site_symmetry_2 
 _geom_bond_publ_flag 
C3 N1 1.473(2) . ? 
C3 C4 1.516(2) . ? 
C3 C15 1.591(2) . ? 
C3 H3 1.0000 . ? 
C2 N1 1.434(2) . ? 
C2 O1 1.4484(19) . ? 
C2 C16 1.506(3) . ? 
C2 H2 1.0000 . ? 
C13 C12 1.360(3) . ? 
C13 C4 1.414(2) . ? 
C13 C14 1.508(2) . ? 
C1 O1 1.415(2) . ? 
C1 C36 1.523(2) . ? 
C1 C15 1.553(3) . ? 
C1 H1 1.0000 . ? 
C4 C5 1.365(2) . ? 
C6 C5 1.420(3) . ? 
C6 C7 1.421(2) . ? 
C6 C11 1.423(2) . ? 
C9 C10 1.378(3) . ? 
C9 C8 1.409(3) . ? 
C9 H9 0.9500 . ? 
C5 H5 0.9500 . ? 
C12 C11 1.425(2) . ? 
C12 H12 0.9500 . ? 
C14 C15 1.545(3) . ? 
C14 H14A 0.9900 . ? 
C14 H14B 0.9900 . ? 
C10 C11 1.411(3) . ? 
C10 H10 0.9500 . ? 
C8 C7 1.359(3) . ? 
C8 H8 0.9500 . ? 
C7 H7 0.9500 . ? 
C15 C29 1.552(2) . ? 
C16 C21 1.387(3) . ? 
C16 C17 1.396(2) . ? 
C17 C18 1.390(3) . ? 
C17 H17 0.9500 . ? 
C21 C20 1.376(3) . ? 
C21 H21 0.9500 . ? 
C19 C18 1.378(3) . ? 
C19 C20 1.391(3) . ? 
C19 H19 0.9500 . ? 
C18 H18 0.9500 . ? 
C20 H20 0.9500 . ? 
C23 C24 1.389(3) . ? 
C23 C28 1.396(3) . ? 
C23 C22 1.512(3) . ? 
C22 N1 1.461(2) . ? 
C22 H22A 0.9900 . ? 
C22 H22B 0.9900 . ? 
C28 C27 1.371(3) . ? 
C28 H28 0.9500 . ? 
C25 C26 1.377(3) . ? 
C25 C24 1.393(3) . ? 
C25 H25 0.9500 . ? 
C26 C27 1.390(3) . ? 
C26 H26 0.9500 . ? 
C27 H27 0.9500 . ? 
C24 H24 0.9500 . ? 
C29 C30 1.512(3) . ? 
C29 H29A 0.9900 . ? 
C29 H29B 0.9900 . ? 
C30 C35 1.383(3) . ? 
C30 C31 1.395(3) . ? 
C31 C32 1.391(3) . ? 
C31 H31 0.9500 . ? 
C35 C34 1.383(3) . ? 
C35 H35 0.9500 . ? 
C33 C32 1.370(3) . ? 
C33 C34 1.378(3) . ? 
C33 H33 0.9500 . ? 
C32 H32 0.9500 . ? 
C34 H34 0.9500 . ? 
C36 F2 1.340(2) . ? 
C36 F1 1.340(2) . ? 
C36 F3 1.342(2) . ? 
 
loop_ 
 _geom_angle_atom_site_label_1 
 _geom_angle_atom_site_label_2 
 _geom_angle_atom_site_label_3 
 _geom_angle 
 _geom_angle_site_symmetry_1 
 _geom_angle_site_symmetry_3 
 _geom_angle_publ_flag 
N1 C3 C4 111.58(14) . . ? 
N1 C3 C15 117.75(14) . . ? 
C4 C3 C15 102.81(14) . . ? 
N1 C3 H3 108.1 . . ? 
C4 C3 H3 108.1 . . ? 
C15 C3 H3 108.1 . . ? 
N1 C2 O1 110.83(14) . . ? 
N1 C2 C16 114.57(15) . . ? 
O1 C2 C16 108.75(14) . . ? 
N1 C2 H2 107.5 . . ? 
O1 C2 H2 107.5 . . ? 
C16 C2 H2 107.5 . . ? 
C12 C13 C4 120.90(15) . . ? 
C12 C13 C14 129.77(16) . . ? 
C4 C13 C14 109.33(15) . . ? 
O1 C1 C36 103.15(15) . . ? 
O1 C1 C15 114.37(15) . . ? 
C36 C1 C15 117.58(15) . . ? 
O1 C1 H1 107.0 . . ? 
C36 C1 H1 107.0 . . ? 
C15 C1 H1 107.0 . . ? 
C5 C4 C13 120.94(16) . . ? 
C5 C4 C3 128.50(16) . . ? 
C13 C4 C3 110.56(14) . . ? 
C5 C6 C7 122.09(17) . . ? 
C5 C6 C11 119.42(15) . . ? 
C7 C6 C11 118.48(17) . . ? 
C10 C9 C8 119.64(18) . . ? 
C10 C9 H9 120.2 . . ? 
C8 C9 H9 120.2 . . ? 
C4 C5 C6 119.69(16) . . ? 
C4 C5 H5 120.2 . . ? 
C6 C5 H5 120.2 . . ? 
C13 C12 C11 119.84(17) . . ? 
C13 C12 H12 120.1 . . ? 
C11 C12 H12 120.1 . . ? 
C13 C14 C15 104.62(14) . . ? 
C13 C14 H14A 110.8 . . ? 
C15 C14 H14A 110.8 . . ? 
C13 C14 H14B 110.8 . . ? 
C15 C14 H14B 110.8 . . ? 
H14A C14 H14B 108.9 . . ? 
C9 C10 C11 121.17(17) . . ? 
C9 C10 H10 119.4 . . ? 
C11 C10 H10 119.4 . . ? 
C7 C8 C9 120.57(17) . . ? 
C7 C8 H8 119.7 . . ? 
C9 C8 H8 119.7 . . ? 
C10 C11 C6 118.85(15) . . ? 
C10 C11 C12 122.02(16) . . ? 
C6 C11 C12 119.13(16) . . ? 
C8 C7 C6 121.22(18) . . ? 
C8 C7 H7 119.4 . . ? 
C6 C7 H7 119.4 . . ? 
C14 C15 C29 112.50(15) . . ? 
C14 C15 C1 108.44(15) . . ? 
C29 C15 C1 112.14(14) . . ? 
C14 C15 C3 102.52(14) . . ? 
C29 C15 C3 114.51(15) . . ? 
C1 C15 C3 106.06(14) . . ? 
C21 C16 C17 118.57(18) . . ? 
C21 C16 C2 122.49(16) . . ? 
C17 C16 C2 118.76(17) . . ? 
C18 C17 C16 120.63(19) . . ? 
C18 C17 H17 119.7 . . ? 
C16 C17 H17 119.7 . . ? 
C20 C21 C16 121.01(17) . . ? 
C20 C21 H21 119.5 . . ? 
C16 C21 H21 119.5 . . ? 
C18 C19 C20 119.96(19) . . ? 
C18 C19 H19 120.0 . . ? 
C20 C19 H19 120.0 . . ? 
C19 C18 C17 119.82(18) . . ? 
C19 C18 H18 120.1 . . ? 
C17 C18 H18 120.1 . . ? 
C21 C20 C19 120.01(19) . . ? 
C21 C20 H20 120.0 . . ? 
C19 C20 H20 120.0 . . ? 
C24 C23 C28 118.51(18) . . ? 
C24 C23 C22 123.08(17) . . ? 
C28 C23 C22 118.37(16) . . ? 
N1 C22 C23 114.16(15) . . ? 
N1 C22 H22A 108.7 . . ? 
C23 C22 H22A 108.7 . . ? 
N1 C22 H22B 108.7 . . ? 
C23 C22 H22B 108.7 . . ? 
H22A C22 H22B 107.6 . . ? 
C27 C28 C23 121.28(19) . . ? 
C27 C28 H28 119.4 . . ? 
C23 C28 H28 119.4 . . ? 
C26 C25 C24 120.30(18) . . ? 
C26 C25 H25 119.9 . . ? 
C24 C25 H25 119.9 . . ? 
C25 C26 C27 119.85(19) . . ? 
C25 C26 H26 120.1 . . ? 
C27 C26 H26 120.1 . . ? 
C28 C27 C26 119.82(19) . . ? 
C28 C27 H27 120.1 . . ? 
C26 C27 H27 120.1 . . ? 
C23 C24 C25 120.24(18) . . ? 
C23 C24 H24 119.9 . . ? 
C25 C24 H24 119.9 . . ? 
C30 C29 C15 116.03(15) . . ? 
C30 C29 H29A 108.3 . . ? 
C15 C29 H29A 108.3 . . ? 
C30 C29 H29B 108.3 . . ? 
C15 C29 H29B 108.3 . . ? 
H29A C29 H29B 107.4 . . ? 
C35 C30 C31 117.86(19) . . ? 
C35 C30 C29 120.89(18) . . ? 
C31 C30 C29 121.20(18) . . ? 
C32 C31 C30 120.7(2) . . ? 
C32 C31 H31 119.6 . . ? 
C30 C31 H31 119.6 . . ? 
C34 C35 C30 121.4(2) . . ? 
C34 C35 H35 119.3 . . ? 
C30 C35 H35 119.3 . . ? 
C32 C33 C34 120.0(2) . . ? 
C32 C33 H33 120.0 . . ? 
C34 C33 H33 120.0 . . ? 
C33 C32 C31 120.1(2) . . ? 
C33 C32 H32 120.0 . . ? 
C31 C32 H32 120.0 . . ? 
C33 C34 C35 119.9(2) . . ? 
C33 C34 H34 120.1 . . ? 
C35 C34 H34 120.1 . . ? 
F2 C36 F1 106.46(16) . . ? 
F2 C36 F3 106.85(14) . . ? 
F1 C36 F3 106.51(15) . . ? 
F2 C36 C1 113.98(15) . . ? 
F1 C36 C1 110.07(15) . . ? 
F3 C36 C1 112.52(16) . . ? 
C2 N1 C22 114.06(14) . . ? 
C2 N1 C3 109.33(14) . . ? 
C22 N1 C3 115.44(14) . . ? 
C1 O1 C2 109.49(13) . . ? 
 
_diffrn_measured_fraction_theta_max    0.978 
_diffrn_reflns_theta_full              27.72 
_diffrn_measured_fraction_theta_full   0.978 
_refine_diff_density_max    0.274 
_refine_diff_density_min   -0.297 
_refine_diff_density_rms    0.052 
